# Supplementary material for: Constructing Active Sites on Self-Supporting Ti3C2Tx (T = OH) Nanosheets for Enhanced Photocatalytic CO2 Reduction into Alcohols
Source: MDPI journal article supplement (doi:10.3390/catal12121594), 2022-12-06
Supplement: s1 [file s1]

## Supporting Information

### Constructing active sites on self-supporting $\text{Ti}_3\text{C}_2\text{T}_x$ ( $\text{T} = \text{OH}$ ) nanosheets for enhanced photocatalytic $\text{CO}_2$ reduction into alcohols

Shuqu Zhang, Man Zhang, Wuwan Xiong, Jianfei Long, Yong Xu, Lixia Yang, Weili Dai\*

*Key Laboratory of Jiangxi Province for Persistent Pollutants Control and Resources Recycle, Nanchang Hangkong University, Nanchang 330063, Jiangxi Province, People's Republic of China*

**\* Corresponding author:**

Email: wldai81@126.com, daiweili@nchu.edu.cn (W. Dai)

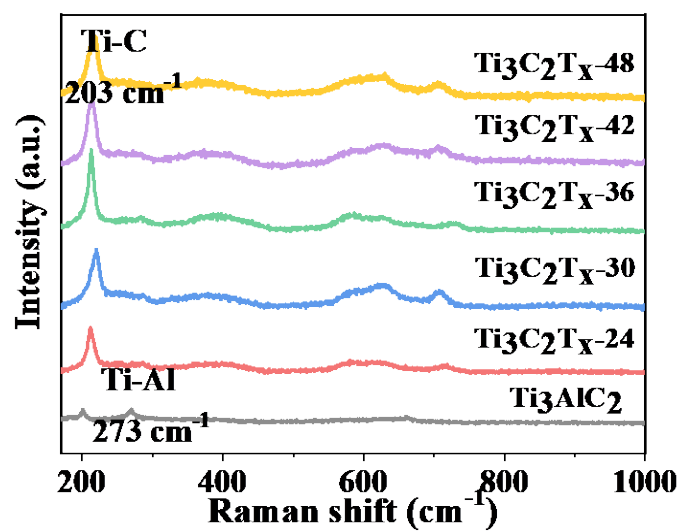

**Figure S1.** Raman spectra of Ti<sub>3</sub>AlC<sub>2</sub>, Ti<sub>3</sub>C<sub>2</sub>T<sub>x-y</sub> nanosheets (y= 24, 30, 36, 42 and 48).

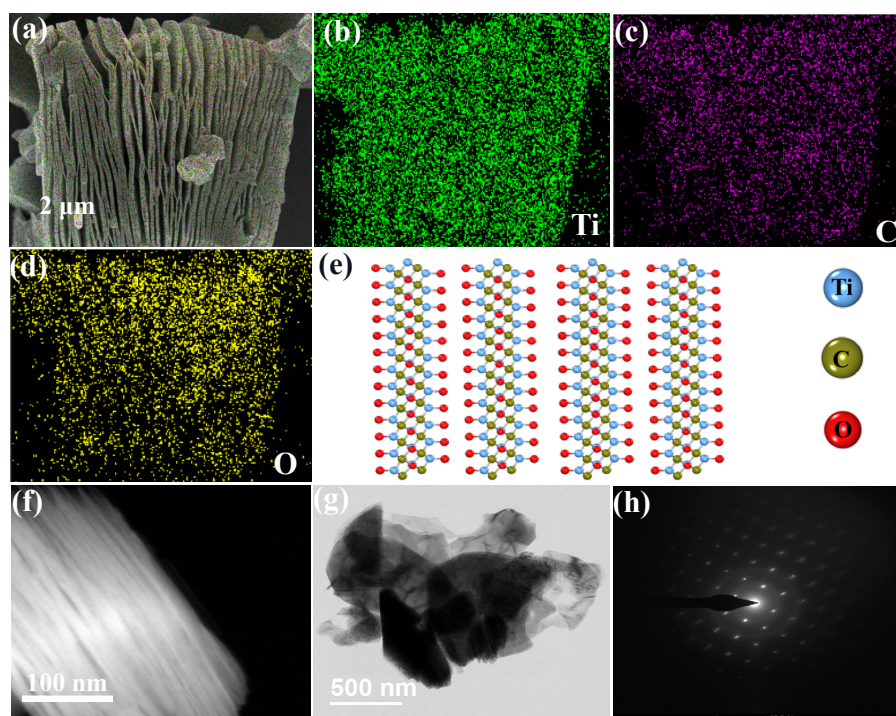

**Figure S2.** SEM image of (a)  $\text{Ti}_3\text{C}_2\text{T}_x$ -36, (b-d) elemental mappings of (a). (e) Atomic structure of  $\text{Ti}_3\text{C}_2\text{T}_x$ , (f) STEM image, (g) TEM image and (h) selected area electron diffraction (SAED) pattern of  $\text{Ti}_3\text{C}_2\text{T}_x$ -36.

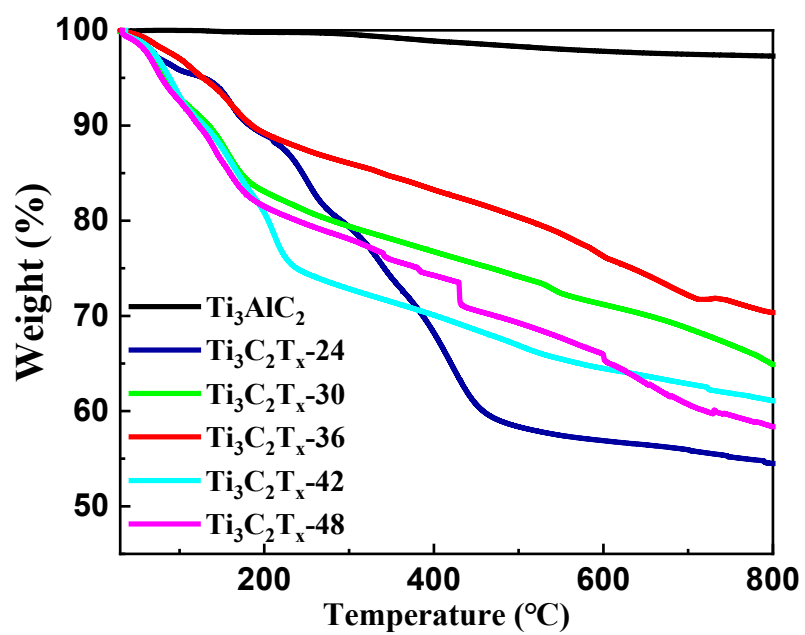

**Figure S3.** TG analysis of (a)  $\text{Ti}_3\text{AlC}_2$ , (b)  $\text{Ti}_3\text{C}_2\text{T}_x$ -24, (c)  $\text{Ti}_3\text{C}_2\text{T}_x$ -30, (d)  $\text{Ti}_3\text{C}_2\text{T}_x$ -36, (e)  $\text{Ti}_3\text{C}_2\text{T}_x$ -42 and (f)  $\text{Ti}_3\text{C}_2\text{T}_x$ -48.

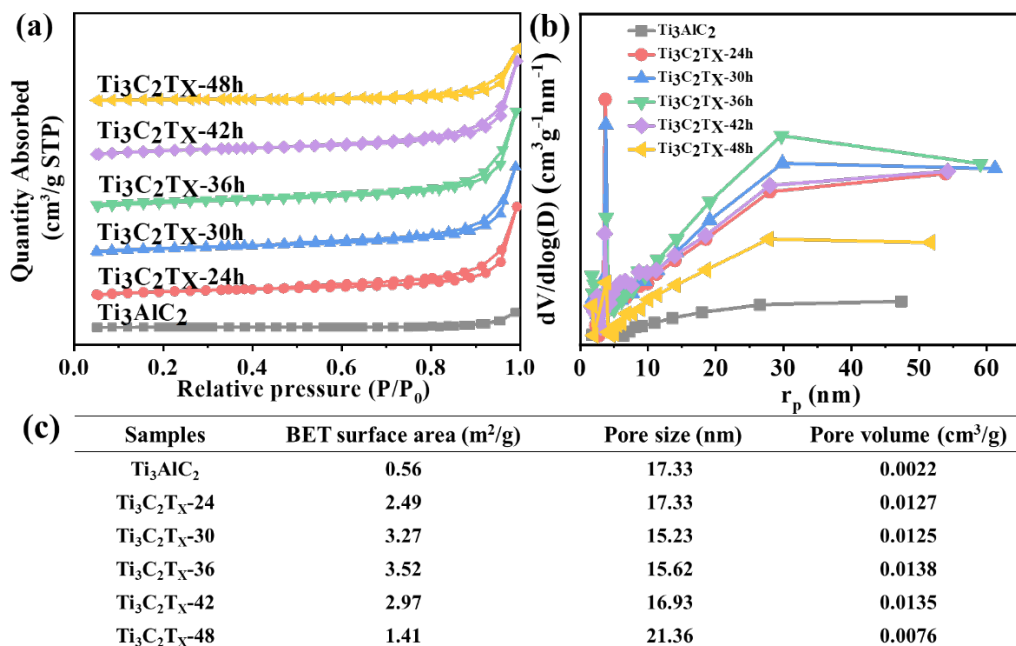

**Figure S4.** (a) Nitrogen adsorption–desorption isotherms, (b) corresponding pore size distribution curves, and (c) information contrast of BET surface area, pore size and pore volume of  $\text{Ti}_3\text{C}_2\text{Tx}$  with different etching times.

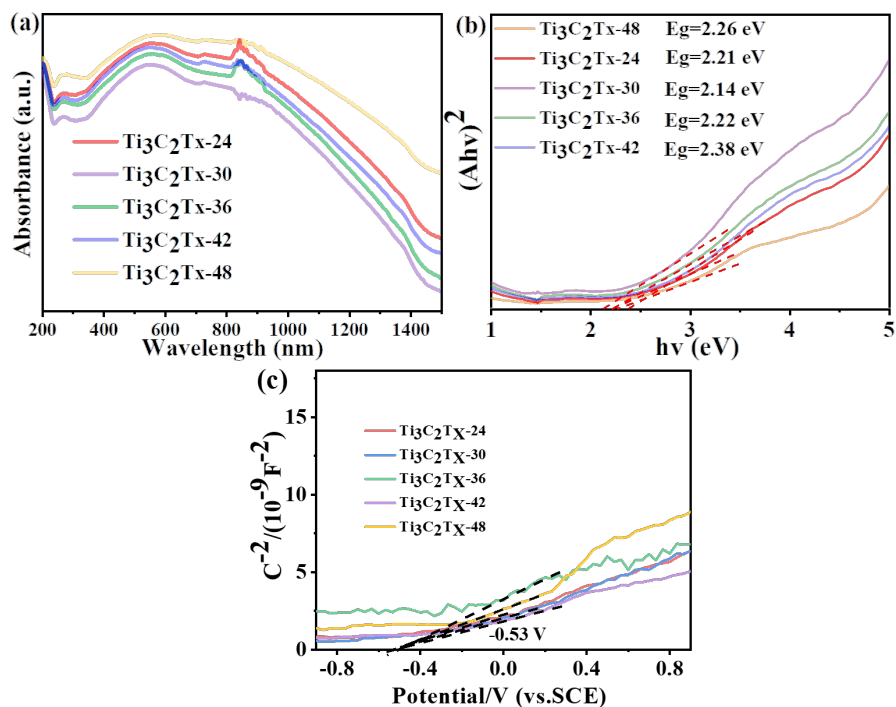

**Figure S5.** (a) UV-vis absorption spectra, (b) Plots of transformed Kubelka–Munk function  $(A/h\nu)^2$  vs light energy ( $h\nu$ ) and (c) Mott-Schottky spectra of  $\text{Ti}_3\text{C}_2\text{Tx-24}$ ,  $\text{Ti}_3\text{C}_2\text{Tx-30}$ ,  $\text{Ti}_3\text{C}_2\text{Tx-36}$ ,  $\text{Ti}_3\text{C}_2\text{Tx-42}$ ,  $\text{Ti}_3\text{C}_2\text{Tx-48}$ .

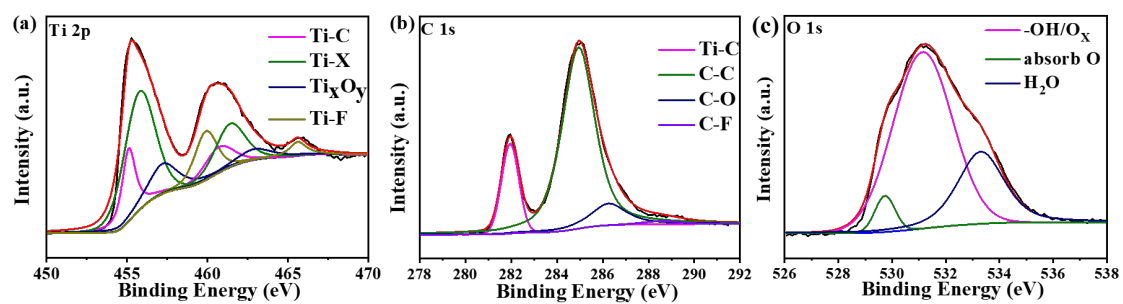

**Figure S6.** High-resolution XPS spectra of (a) Ti 2p, (b) C 1s and (c) O 1s over  $\text{Ti}_3\text{C}_2\text{T}_x-36$ .

**Table S1.** The comparison of photocatalytic activity for CO<sub>2</sub> reduction (products: methanol and ethanol) by some photocatalyst systems.

| No. | Photocatalyst                                          | Reaction conditions                                 | Products                                               | Formation rate<br>( $\mu\text{mol g}^{-1} \text{h}^{-1}$ ) | Ref.      |
|-----|--------------------------------------------------------|-----------------------------------------------------|--------------------------------------------------------|------------------------------------------------------------|-----------|
| 1   | Au-ZIF 67                                              | 150 mW/cm <sup>2</sup><br>TEOA                      | CH <sub>3</sub> OH<br>C <sub>2</sub> H <sub>5</sub> OH | 2500<br>500                                                | 27        |
| 2   | Cu-TiO <sub>2</sub> /GO                                | Hg lamp                                             | CH <sub>3</sub> OH<br>C <sub>2</sub> H <sub>5</sub> OH | 157<br>265                                                 | 28        |
| 3   | Cu /UiO-66-NH <sub>2</sub>                             | 300 W Xenon lamp $\lambda > 400 \text{ nm}$<br>TEOA | CH <sub>3</sub> OH<br>C <sub>2</sub> H <sub>5</sub> OH | 5.33<br>4.22                                               | 29        |
| 4   | Pt/N-BiOCl                                             | 300 W Xenon lamp                                    | CH <sub>3</sub> OH<br>C <sub>2</sub> H <sub>5</sub> OH | 41.09<br>1.65                                              | 30        |
| 5   | Co/g-C <sub>3</sub> N <sub>4</sub>                     | 300 W Xenon lamp 1.5 W/cm <sup>2</sup>              | CH <sub>3</sub> OH                                     | 235.48                                                     | 31        |
| 6   | Gd/BiOBr                                               | 300 W Xenon lamp $\lambda > 420 \text{ nm}$         | CH <sub>3</sub> OH                                     | 41.24                                                      | 32        |
| 7   | Bi <sub>2</sub> WO <sub>6</sub>                        | LED lamp                                            | C <sub>2</sub> H <sub>5</sub> OH                       | 68.9                                                       | 33        |
| 8   | TiO <sub>2</sub> /rGO/CeO <sub>2</sub>                 | Hg lamp                                             | CH <sub>3</sub> OH<br>C <sub>2</sub> H <sub>5</sub> OH | 641<br>271                                                 | 34        |
| 9   | Bi <sub>2</sub> MoO <sub>6</sub>                       | LED lamp 810 W/cm <sup>2</sup>                      | C <sub>2</sub> H <sub>5</sub> OH                       | 34.4                                                       | 35        |
| 10  | Cu/Pt-HCa <sub>2</sub> Ta <sub>3</sub> O <sub>10</sub> | 100 mW/cm <sup>2</sup>                              | CH <sub>3</sub> OH<br>C <sub>2</sub> H <sub>5</sub> OH | 113<br>7.4                                                 | 36        |
| 11  | Ti <sub>3</sub> C <sub>2</sub> T <sub>x</sub>          | 300 W Xenon lamp $\lambda > 420 \text{ nm}$         | CH <sub>3</sub> OH<br>C <sub>2</sub> H <sub>5</sub> OH | 9.525<br>5.725                                             | This work |



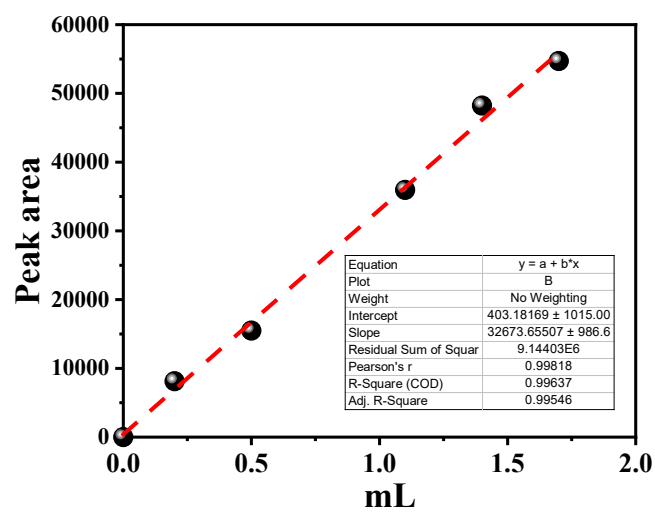

**Figure S7.** Calibration curves of the relationships between peak area and O<sub>2</sub> volume.

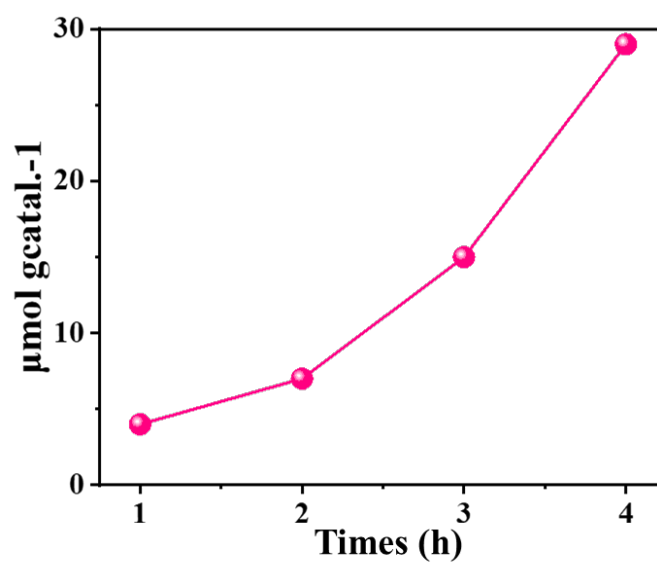

**Figure S8.** O<sub>2</sub> evolution during photocatalytic CO<sub>2</sub> reduction over Ti<sub>3</sub>C<sub>2</sub>T<sub>x</sub>-36.
